# Supplementary material for: Effect of Clinical and Laboratory Parameters on HDL Particle Composition
Source: MDPI journal article supplement (doi:10.3390/ijms24031995), 2023-01-19
Supplement: s1 [file s1]

**Table S1:** Correlation between serum lipid and apolipoprotein parameters and FA pattern of HDL

| HDL FA pattern  | Serum lipid and apolipoprotein profile |       |       |       |             |       |          |       |
|-----------------|----------------------------------------|-------|-------|-------|-------------|-------|----------|-------|
|                 | TC                                     | TG    | HDL-C | ApoAI | HDL-C/apoAI | LDL-C | nonHDL-C | Apo B |
| <i>SFA</i>      | 0.10*                                  | 0.01  | -0.08 | 0.13  | -0.13       | 0.12  | 0.13     | -0.06 |
|                 | -                                      | -     | -     | -     | -           | -     | -        | -     |
| <i>UFA</i>      | -0.10                                  | -0.01 | 0.08  | -0.13 | 0.13        | -0.12 | -0.13    | 0.06  |
|                 | -                                      | -     | -     | -     | -           | -     | -        | -     |
| <i>MUFA</i>     | -0.19                                  | -0.04 | -0.10 | -0.14 | 0.01        | -0.12 | -0.14    | -0.04 |
|                 | -                                      | -     | -     | -     | -           | -     | -        | -     |
| <i>PUFA</i>     | 0.04                                   | 0.04  | 0.17  | -0.04 | 0.15        | -0.04 | -0.04    | 0.11  |
|                 | -                                      | -     | -     | -     | -           | -     | -        | -     |
| <i>LA</i>       | 0.09                                   | -0.09 | 0.03  | 0.08  | 0.05        | 0.11  | 0.08     | 0.19  |
|                 | -                                      | -     | -     | -     | -           | -     | -        | -     |
| <i>EPA + AA</i> | -0.11                                  | 0.10  | -0.21 | -0.01 | -0.20       | -0.05 | -0.01    | 0.07  |
|                 | -                                      | -     | -     | -     | -           | -     | -        | -     |
| <i>DHA</i>      | 0.002                                  | 0.13  | -0.02 | 0.01  | 0.27        | 0.05  | 0.01     | 0.20  |
|                 | -                                      | -     | -     | -     | -           | -     | -        | -     |
| <i>SFA/UFA</i>  | 0.10                                   | -0.01 | -0.09 | 0.14  | -0.13       | 0.14  | 0.14     | -0.06 |
|                 | -                                      | -     | -     | -     | -           | -     | -        | -     |
| <i>SFA/PUFA</i> | 0.05                                   | -0.04 | -0.12 | 0.11  | -0.14       | 0.11  | 0.11     | -0.09 |
|                 | -                                      | -     | -     | -     | -           | -     | -        | -     |
| <i>ACL</i>      | -0.01                                  | 0.07  | 0.05  | -0.04 | 0.11        | -0.05 | -0.04    | 0.16  |
|                 | -                                      | -     | -     | -     | -           | -     | -        | -     |

\*: r Pearson Correlation, p value, -: not significant

**Table S2:** Serum lipid parameters and apolipoproteins of the two groups studied

|                   | <b>Males</b> | <b>Females</b> | <b>p</b> |
|-------------------|--------------|----------------|----------|
| N                 | 44           | 46             |          |
| Age, years        | 48.7 ± 12.8  | 50.3 ± 12.7    | NS       |
| TC (mg/dL)        | 174 ± 19     | 168 ± 21       | NS       |
| TG (mg/dL)        | 108 ± 34     | 97 ± 31        | NS       |
| HDL-C (mg/dL)     | 48 ± 11      | 50 ± 8         | NS       |
| LDL-C (mg/dL)     | 104 ± 22     | 101 ± 21       | NS       |
| non-HDL-C (mg/dL) | 126 ± 20     | 119 ± 20       | NS       |
| apoAI (mg/dL)     | 139 ± 24     | 134 ± 21       | NS       |
| apo B (mg/dL)     | 80 ± 14      | 82 ± 19        | NS       |
| HDL-C/apoAI       | 0.3 ± 0.04   | 0.4 ± 0.05     | NS       |
| LDL-C/apoB        | 1.2 ± 0.2    | 1.2 ± 0.1      | NS       |
| non-HDL-C/apoB    | 1.5 ± 0.2    | 1.5 ± 0.2      | NS       |

NS: not significant

**Table S3:** Effect of gender on the HDL phospholipid pattern in the healthy population

| Phospholipids          | Total        |              |        | 30-39 years  |                | 40-49 years  |              | 50-59 years  |               | ≥ 60 years   |                |
|------------------------|--------------|--------------|--------|--------------|----------------|--------------|--------------|--------------|---------------|--------------|----------------|
|                        | Males        | Females      | p      | Males        | Females        | Males        | Females      | Males        | Females       | Males        | Females        |
| n                      | 44           | 46           |        | 14           | 13             | 11           | 12           | 8            | 7             | 11           | 14             |
| <b>Total GPLs</b>      | 42.01 ± 1.70 | 41.55 ± 2.12 | NS     | 42.71 ± 0.81 | 43.19 ± 1.12   | 42.08 ± 1.75 | 41.64 ± 1.77 | 40.50 ± 2.12 | 40.60 ± 2.37  | 42.15 ± 1.69 | 40.45 ± 2.15*  |
| PC                     | 34.07 ± 1.76 | 32.27 ± 2.36 | <0.001 | 34.98 ± 1.85 | 33.11 ± 1.21** | 33.82 ± 1.43 | 33.89 ± 0.70 | 32.99 ± 2.00 | 30.61 ± 2.58* | 33.96 ± 1.35 | 30.96 ± 2.83** |
| LysoPC                 | 3.02 ± 0.65  | 3.31 ± 0.77  | NS     | 2.96 ± 0.65  | 2.88 ± 0.36    | 2.73 ± 0.37  | 3.08 ± 0.29* | 3.26 ± 1.03  | 3.24 ± 0.95   | 3.20 ± 0.47  | 3.94 ± 0.89*   |
| PE                     | 1.02 ± 0.22  | 0.96 ± 0.27  | NS     | 1.20 ± 0.15  | 1.22 ± 0.10    | 1.04 ± 0.16  | 1.09 ± 0.11  | 0.94 ± 0.28  | 0.71 ± 0.08*  | 0.83 ± 0.12  | 0.75 ± 0.26    |
| PI                     | 1.49 ± 0.50  | 1.26 ± 0.32  | <0.05  | 1.44 ± 0.26  | 1.35 ± 0.22    | 1.72 ± 0.73  | 1.46 ± 0.27  | 1.41 ± 0.67  | 1.12 ± 0.33   | 1.38 ± 0.24  | 1.07 ± 0.31*   |
| Rest GPLs              | 2.41 ± 1.78  | 3.75 ± 2.43  | <0.01  | 2.13 ± 1.44  | 4.64 ± 1.83**  | 2.77 ± 1.87  | 2.12 ± 0.73  | 1.90 ± 0.64  | 4.92 ± 2.38*  | 2.78 ± 2.21  | 3.73 ± 2.62    |
|                        |              |              |        |              |                |              |              |              |               |              |                |
| <b>Total ether GLs</b> | 4.90 ± 0.74  | 4.91 ± 0.76  | NS     | 4.61 ± 0.72  | 4.87 ± 0.37    | 5.00 ± 0.78  | 5.48 ± 0.62  | 5.35 ± 0.82  | 4.69 ± 0.68   | 4.81 ± 0.53  | 4.59 ± 0.94    |
| Plasmalogens           | 1.80 ± 0.24  | 1.74 ± 0.37  | NS     | 1.82 ± 0.28  | 1.83 ± 0.23    | 1.80 ± 0.21  | 1.64 ± 0.14* | 1.67 ± 0.16  | 1.55 ± 0.11*  | 1.88 ± 0.25  | 1.85 ± 0.60    |
| Rest ether GLs         | 3.10 ± 0.82  | 3.17 ± 0.79  | NS     | 2.79 ± 0.76  | 3.04 ± 0.37    | 3.20 ± 0.90  | 3.84 ± 0.73  | 3.68 ± 0.85  | 3.14 ± 0.62   | 2.93 ± 0.60  | 2.74 ± 0.88    |
|                        |              |              |        |              |                |              |              |              |               |              |                |
| <b>Total SLs</b>       | 7.32 ± 0.92  | 7.36 ± 0.89  | NS     | 7.22 ± 0.69  | 7.37 ± 0.77    | 7.44 ± 1.09  | 7.42 ± 0.49  | 7.36 ± 1.14  | 7.22 ± 0.50   | 7.32 ± 0.95  | 7.32 ± 1.36    |
| SM                     | 6.35 ± 1.12  | 6.58 ± 1.08  | NS     | 6.82 ± 0.77  | 7.07 ± 0.79    | 6.86 ± 0.98  | 7.03 ± 0.55  | 5.79 ± 1.27  | 6.13 ± 1.00   | 5.66 ± 1.09  | 5.96 ± 1.35    |
| Rest SLs               | 0.97 ± 0.29  | 0.78 ± 0.71  | NS     | 0.40 ± 0.36  | 0.30 ± 0.17    | 0.58 ± 0.39  | 0.39 ± 0.17  | 1.57 ± 0.51  | 1.09 ± 0.62   | 1.66 ± 1.34  | 1.36 ± 0.84    |
|                        |              |              |        |              |                |              |              |              |               |              |                |
| PC/SM                  | 4.77 ± 0.54  | 4.97 ± 0.70  | NS     | 5.11 ± 0.51  | 5.12 ± 0.52    | 4.89 ± 0.33  | 4.84 ± 0.41  | 4.40 ± 0.52  | 4.33 ± 0.23   | 4.49 ± 0.48  | 5.24 ± 0.98*   |

\*p<0.05, \*\*p<0.01: compared to males, NS: not significant

**Table S4:** Effect of gender on the HDL fatty acid pattern in the healthy population

| Fatty acid pattern | Total        |              |       | 30-39 years  |                | 40-49 years  |              | 50-59 years  |              | ≥ 60 years   |                 |
|--------------------|--------------|--------------|-------|--------------|----------------|--------------|--------------|--------------|--------------|--------------|-----------------|
|                    | Men          | Women        | p     | Men          | Women          | Men          | Women        | Men          | Women        | Men          | Women           |
| n                  | 44           | 46           |       | 14           | 13             | 11           | 12           | 8            | 7            | 11           | 14              |
| <b>SFA</b>         | 36.70 ± 6.91 | 36.84 ± 6.44 | NS    | 32.51 ± 7.48 | 31.37 ± 6.41   | 37.01 ± 7.58 | 40.05 ± 4.09 | 38.06 ± 3.88 | 39.68 ± 6.30 | 40.71 ± 4.54 | 37.76 ± 5.31    |
| <b>UFA</b>         | 63.30 ± 6.91 | 63.16 ± 6.44 | NS    | 67.49 ± 7.48 | 68.63 ± 6.41   | 62.99 ± 7.58 | 59.95 ± 4.09 | 61.94 ± 3.88 | 60.32 ± 6.30 | 59.29 ± 4.54 | 62.24 ± 5.31    |
| <b>MUFA</b>        | 8.40 ± 4.13  | 8.75 ± 5.60  | NS    | 8.91 ± 4.04  | 13.41 ± 4.15** | 7.73 ± 3.74  | 5.69 ± 4.84  | 8.84 ± 5.23  | 6.73 ± 4.78  | 8.08 ± 4.21  | 8.05 ± 5.39     |
| <b>PUFA</b>        | 54.90 ± 6.66 | 54.41 ± 4.81 | NS    | 58.58 ± 8.88 | 55.22 ± 7.57   | 55.26 ± 6.36 | 54.26 ± 3.82 | 53.10 ± 2.72 | 53.59 ± 2.08 | 51.21 ± 2.41 | 54.19 ± 3.46*   |
| <b>LA</b>          | 19.12 ± 3.16 | 19.59 ± 2.45 | NS    | 21.82 ± 3.17 | 21.91 ± 2.68   | 18.73 ± 2.03 | 18.00 ± 1.83 | 18.89 ± 2.21 | 18.98 ± 0.92 | 16.22 ± 1.63 | 19.08 ± 1.67*** |
| <b>EPA+AA</b>      | 10.88 ± 1.84 | 10.61 ± 1.27 | NS    | 11.31 ± 1.30 | 10.42 ± 1.33   | 10.92 ± 2.12 | 10.74 ± 1.18 | 9.80 ± 2.67  | 10.32 ± 0.98 | 11.10 ± 1.24 | 10.82 ± 1.47    |
| <b>DHA</b>         | 3.55 ± 0.67  | 3.94 ± 0.76  | <0.05 | 3.90 ± 0.53  | 4.41 ± 0.91    | 3.83 ± 0.48  | 4.01 ± 0.64  | 3.40 ± 0.62  | 3.74 ± 0.45  | 2.92 ± 0.57  | 3.54 ± 0.62*    |
|                    |              |              |       |              |                |              |              |              |              |              |                 |
| <b>SFA/UFA</b>     | 0.60 ± 0.18  | 0.60 ± 0.16  | NS    | 0.50 ± 0.18  | 0.47 ± 0.16    | 0.61 ± 0.21  | 0.68 ± 0.12  | 0.62 ± 0.10  | 0.67 ± 0.17  | 0.70 ± 0.13  | 0.62 ± 0.13     |
| <b>SFA/PUFA</b>    | 0.69 ± 0.19  | 0.69 ± 0.17  | NS    | 0.58 ± 0.21  | 0.60 ± 0.21    | 0.69 ± 0.22  | 0.74 ± 0.11  | 0.72 ± 0.07  | 0.74 ± 0.14  | 0.80 ± 0.11  | 0.70 ± 0.11*    |
| <b>ACL</b>         | 16.35 ± 1.53 | 15.99 ± 1.58 | NS    | 17.04 ± 1.36 | 16.79 ± 2.30   | 16.90 ± 1.68 | 16.13 ± 0.91 | 15.55 ± 1.02 | 14.76 ± 0.72 | 15.49 ± 1.33 | 15.76 ± 1.14    |

\*p<0.05, \*\*p<0.01, \*\*\*p<0.001: compared to males, NS: not significant

**Table S5:** Serum lipid parameters and apolipoproteins of the premenopausal and postmenopausal females.

|                   | Premenopausal<br>females | Postmenopausal<br>females | p      |
|-------------------|--------------------------|---------------------------|--------|
| N                 | 22                       | 24                        |        |
| Age, years        | 39.1 ± 5.5               | 60.5 ± 7.6                | <0.001 |
| TC (mg/dL)        | 166 ± 18                 | 170 ± 24                  | NS     |
| TG (mg/dL)        | 72 ± 20                  | 101 ± 33                  | <0.01  |
| HDL-C (mg/dL)     | 49 ± 7                   | 50 ± 9                    | NS     |
| LDL-C (mg/dL)     | 103 ± 20                 | 100 ± 22                  | NS     |
| non-HDL-C (mg/dL) | 117 ± 20                 | 120 ± 20                  | NS     |
| apoAI (mg/dL)     | 123 ± 23                 | 144 ± 25                  | <0.05  |
| apo B (mg/dL)     | 86 ± 18                  | 77 ± 19                   | NS     |
| HDL-C/apoAI       | 0.4 ± 0.03               | 0.3 ± 0.06                | <0.05  |
| LDL-C/apoB        | 1.2 ± 0.1                | 1.3 ± 0.1                 | NS     |
| non-HDL-C/apoB    | 1.4 ± 0.1                | 1.6 ± 0.2                 | <0.01  |

NS: not significant

**Table S6:** Effect of menopausal status on the fatty acid profile of esterified HDL lipids

| Fatty acid pattern                             | Premenopausal | Postmenopausal | p     |
|------------------------------------------------|---------------|----------------|-------|
| n                                              | 22            | 24             |       |
| <i>Saturated fatty acids (SFA)</i>             | 35.28 ± 7.28  | 38.28 ± 5.31   | NS    |
| <i>Unsaturated fatty acids (UFA)</i>           | 64.72 ± 7.28  | 61.72 ± 5.31   | NS    |
| <i>Monounsaturated fatty acids (MUFA)</i>      | 9.95 ± 6.20   | 7.64 ± 4.85    | NS    |
| <i>Polyunsaturated fatty acids (PUFA)</i>      | 54.77 ± 6.34  | 54.08 ± 2.86   | NS    |
| Linoleic acid (LA)                             | 20.60 ± 2.76  | 18.66 ± 1.71   | <0.01 |
| Eicosapentaenoic + arachidonic acid (EPA + AA) | 10.37 ± 1.12  | 10.81 ± 1.39   | NS    |
| Docosahexaenoic acid (DHA)                     | 4.27 ± 0.84   | 3.36 ± 0.53    | <0.01 |
| <b>Ratio</b>                                   |               |                |       |
| SFA/UFA                                        | 0.56 ± 0.18   | 0.63 ± 0.13    | NS    |
| SFA/PUFA                                       | 0.76 ± 0.22   | 0.71 ± 0.12    | NS    |
| Average chain length (ACL)                     | 16.51 ± 1.88  | 15.51 ± 1.07   | NS    |

NS: not significant
